# Supplementary material for: Trans- and Multigenerational Effects of Isothiazolinone Biocide CMIT/MIT on Genotoxicity and Epigenotoxicity in Daphnia magna
Source: MDPI journal article supplement (doi:10.3390/toxics11040388), 2023-04-20
Supplement: s1 [file s1]

## Supporting Information

### **Trans- and multigenerational effects of isothiazolinone biocide CMIT/MIT on genotoxicity and epigenotoxicity in *Daphnia magna***

Jiwan Kim and Jinhee Choi\*

School of Environmental Engineering, University of Seoul, 163 Seoulsiripdae-ro,  
Dongdaemun-gu, Seoul 02504, Republic of Korea

\*Corresponding author:

Tel: 82-2-6490-2869

Fax: 82-2-6490-2859

E-mail: jinhchoi@uos.ac.kr

#### **Abbreviations**

CMIT/MIT: The mixture of 5-Chloro-2-methyl-3(2H)-isothiazolone and 2-methyl-3(2H)-isothiazolone

PE: Parental exposure

ME: Multigenerational exposure

HPLC-DAD: High-performance liquid chromatography with diode array detection

#### **Summary of supplementary materials:**

Sixteen pages

Supplementary method

Three figures

Four tables

References

# Table of Contents

## 1. Supplementary method

## 2. Supplementary figures

**Figure S1.** The experimental setup of live imaging for behavior assay.

**Figure S2.** First reproduction time of daphnids exposed to CMIT/MIT.

**Figure S3.** Morphological observation of 7-day-old daphnids exposed to EC<sub>20</sub> CMIT/MIT.

## 3. Supplementary tables

**Table S1.** High-performance liquid chromatography with diode array detection (HPLC-DAD) conditions used in this study.

**Table S2.** Detected concentrations of CMIT and MIT in products and aquatic environments.

**Table S3.** Acute lethal concentrations (LCs) and chronic effective concentrations (ECs) of CMIT/MIT in *Daphnia magna*.

**Table S4.** Differentially expressed proteins (DEPs) after exposure to EC<sub>20</sub> CMIT/MIT compared with the control group in the parental generation (P0) of *Daphnia magna*.

## 1. Supplementary method

### *Quantitative MS-based proteomics*

For proteomic analysis, proteins from *Daphnia magna* were lysed in RIPA buffer (Thermo Fisher Scientific Inc., Rockford, IL) with sonication at 30% for 30 seconds. Extracted proteins were precipitated in 10% trichloroacetic acid overnight at 4 °C to remove the detergent and were centrifuged at 14,000xg for 10 min at 4 °C. The pellets were rinsed with ice-cold acetone twice and recentrifuged at 14,000xg for 10 min at 4 °C. Protein pellets were dissolved in 50 mM ammonium bicarbonate (ABC) buffer. For reduction and alkylation, the proteins were supplemented with 15 mM dithiothreitol in 20 mM ABC at 56 °C for 30 min and alkylated using iodoacetamide in 25 mM ABC at room temperature for 30 min under dark conditions. To withdraw the reduction and alkylation reagents, the proteins were subjected to ice-cold acetone precipitation at 20 °C for 4 h. After centrifugation at 14,000xg for 10 min at 4 °C, the protein pellets were re-suspended in 100 mM triethylammonium bicarbonate and analyzed with a BCA protein assay kit (Thermo Fisher Scientific Inc., Rockford, IL).

For the quantitative proteomic approach, each 100 mg of proteins was transferred to new Eppendorf tubes and incubated at 37 °C for 16 h with trypsin at 1:50 w/w to make peptides. Then, 0.8 mg of sixplex tandem mass tag (TMT) reagent (Thermo Fisher Scientific Inc., Rockford, IL) was added to 41 mL of anhydrous acetonitrile in each tube. Additionally, peptides were labeled with TMT at room temperature for an hour. For the quenching reaction, peptides were supplemented with 8 mL of 5% hydroxylamine and incubated for 15 min. Finally, the labeled peptides were combined, and fractionation steps were conducted using high-pH reversed-phase peptide fractionation kits (Thermo Fisher Scientific Inc., Rockford, IL), following the procedure provided by the product's manufacturer. Before the mass spectrometry analysis, all samples were desalted with a C18 Zip tip (Merck Millipore, Billerica, MA) according to the manufacturer's instructions and dried completely using a speed vacuum.

Dried peptides were dissolved in solution A (water with 0.1% formic acid) and analyzed using a nano LC-MS/MS system consisting of Easy-nLC 1000 (Thermo Fisher Scientific Inc., Waltham, MA) and a Q Exactive Hybrid Quadrupole-Orbitrap mass spectrometer (Thermo Fisher Scientific Inc., Waltham, MA). The separation of peptides was performed using a home-made C18 reversed-phase column (Dr. Maisch GmbH, Ammerbuch-Entringen, Germany) with a nanospray source. A 60 min linear gradient was used at a flow rate of 200 nL/min from 2 to 20% with solution B (0.1% formic acid in 100% acetonitrile) for 44 min, 20-90% with solution B for 5 min, and at 90% with solution B for over 11 min to completely elute the peptides. Q-Exactive was operated in a data-dependent mode using the following parameters: nanospray voltage with positive charge of 2.2 KV; scan range of 300 to 1400 m/z; a total of 15 data-dependent higher-energy collisional dissociation MS/MS scans per full MS; resolution of 70,000 and 17,500 for full MS and MS/MS, respectively; dynamic exclusion time of fragmented ions of 25 seconds; AGC target of 3e6; maximum inject time for full MS of 50 ms. Experiments were performed with biological duplicates and technical duplicates.

To identify and quantify the proteomic results, raw files were merged using MM file conversion and searched using Mascot 2.3 (Matrix Science) with the *Daphnia magna* and *Daphnia pulex* proteome database downloaded from Uniprot (<http://www.uniprot.org/>). The search parameters were as follows: two missed trypsin cleavages; fixed modification of carbamidomethylation to cysteine; variable modification of oxidation to methionine and

protein N-term acetylation. MS and MS/MS tolerance were 10 ppm and 0.05 Da, respectively. The search results were filtered with a mascot score  $\geq 20$  and a false discovery rate (FDR)  $\leq 0.01$ .

## 2. Supplementary figures

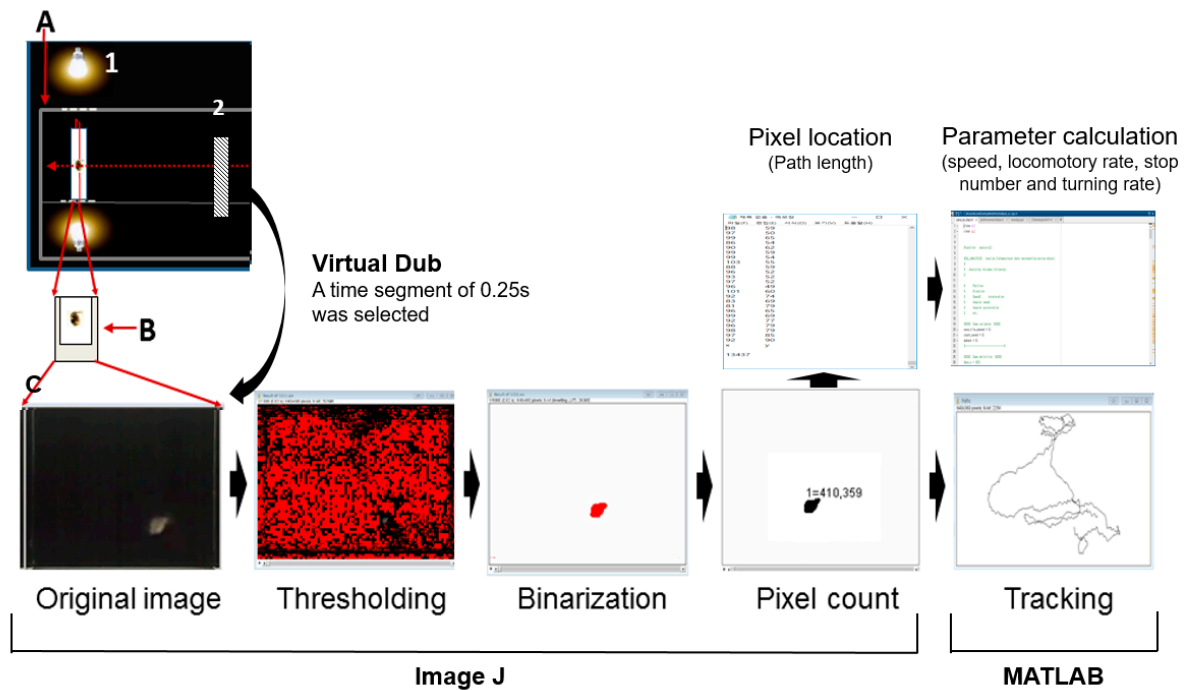

**Figure S1. The experimental setup of live imaging for behavior assay.** (A) Camera set (300 X 180 X 240 mm) with black sheet for the background of the image: 1. Flash to uniformly scatter the light from two sides of the camera set; 2. camera (iphone3gs). (B) Chamber (100 X 30 X 95 mm) with medium (M4 or CMIT/MIT) and one daphnia in the well. (C) Procedures of image processing in Image J and MATLAB. The original images that were obtained from the chamber were binarized with an optimized threshold, and the x, y coordinates of the object (pixel) were counted so that the tracking analysis could be used for illustrating swimming behaviors such as speed, turning, and hop and sink.

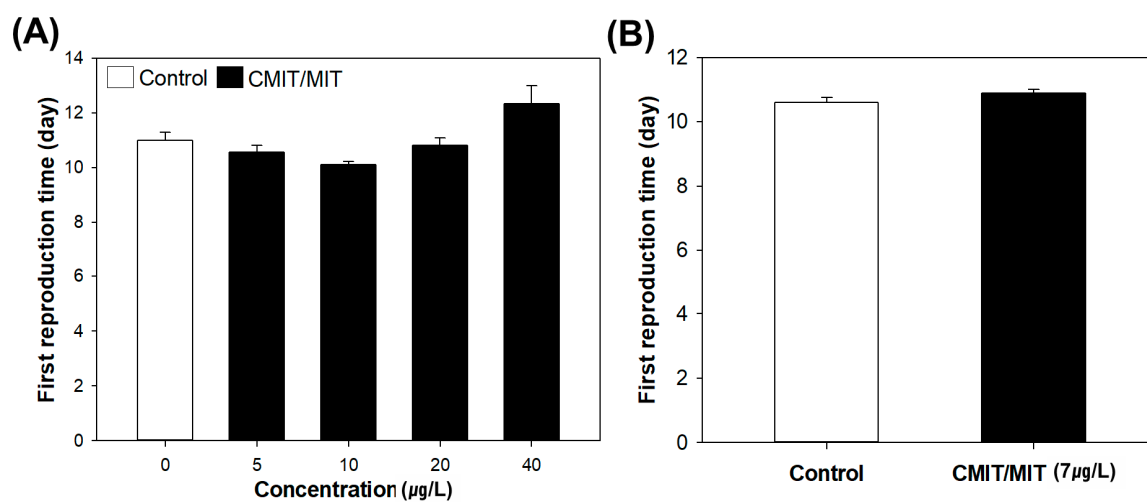

**Figure S2. First reproduction time of daphnids exposed to CMIT/MIT.** (A) First reproduction time of daphnids exposed to 5, 10, 20, and 40 µg/L CMIT/MIT, except for the highest concentration, at which adults never produced neonates. (B) First reproduction time of daphnids after exposure to EC<sub>20</sub> CMIT/MIT (7 µg/L).

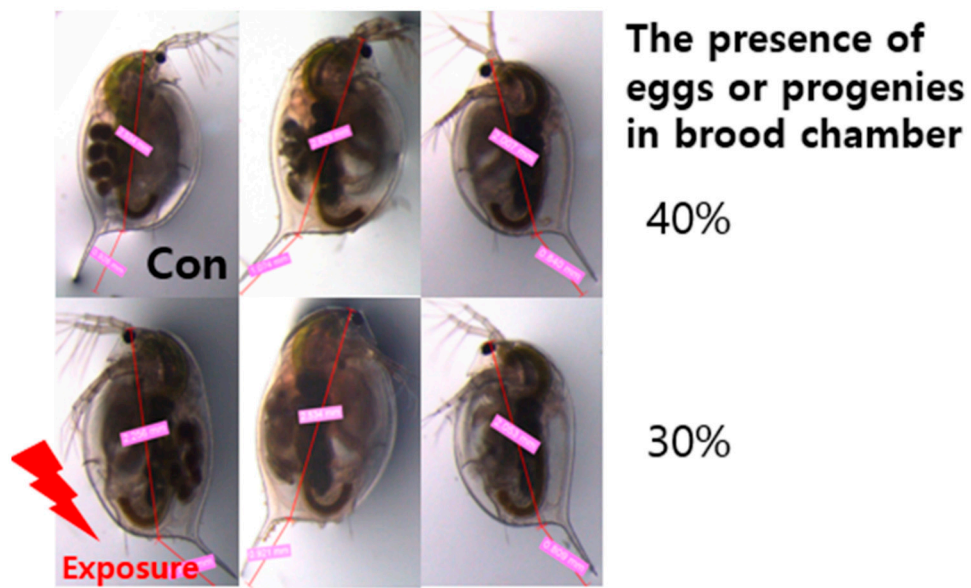

**Figure S3. Morphological observation of 7-day-old daphnids exposed to EC<sub>20</sub> CMIT/MIT.** % indicates the percentage of organisms that had eggs or progenies in their brood chamber.

## 2. Supplementary tables

**Table S1. High-performance liquid chromatography with diode array detection (HPLC-DAD) conditions used in this study.**

| Analytical conditions of HPLC-DAD |                                                            |       |       |
|-----------------------------------|------------------------------------------------------------|-------|-------|
| Chemical                          | CMIT and MIT                                               |       |       |
| Sample pretreatment               | Filtration of samples with 0.45 $\mu\text{m}$ nylon filter |       |       |
| Model                             | Agilent 1260 Infinity HPLC-DAD                             |       |       |
| Column                            | Eclipse XDB-C18 (4.6 mm*250 mm*5 $\mu\text{m}$ )           |       |       |
| Column temperature                | 30 $^{\circ}\text{C}$                                      |       |       |
| Detection wavelength              | 280 nm                                                     |       |       |
| Flow rate                         | 1.0 mL/min                                                 |       |       |
| Injection volume                  | 10 $\mu\text{L}$                                           |       |       |
| Mobile phase                      | A: 0.1% formic acid in water, B: acetonitrile              |       |       |
| Gradient                          | Time (min)                                                 | A (%) | B (%) |
|                                   | 0.00                                                       | 95    | 5     |
|                                   | 3.00                                                       | 95    | 5     |
|                                   | 8.00                                                       | 80    | 20    |
|                                   | 9.00                                                       | 95    | 5     |
|                                   | 21.00                                                      | 95    | 5     |



**Table S2. Detected concentrations of CMIT and MIT in products and aquatic environments.**

| Sample      |                                                                                                                                         | Detection Instrument | Detected Concentration or Amount                                                                                                                                                                                                               | Reference                          |
|-------------|-----------------------------------------------------------------------------------------------------------------------------------------|----------------------|------------------------------------------------------------------------------------------------------------------------------------------------------------------------------------------------------------------------------------------------|------------------------------------|
| Product     | Three nail polishes from commercial markets                                                                                             | UPLC-MS/MS           | CMIT: 17.19-35.24 µg/g<br>MIT: 11.45-34.63 µg/g                                                                                                                                                                                                | Lee et al., 2020                   |
|             | Cosmetics (rinse-off and leave-on types) and household product samples (detergents and cleaning products)                               | HPLC-MS/MS           | CMIT/MIT mixture (3:1): 0.000095-0.0067% (w/w) in cosmetic samples and 0.0006-0.0011% (w/w) in home care products                                                                                                                              | Alvarez-Rivera et al., 2012        |
|             | Water-based adhesive                                                                                                                    | HPLC-MS/MS           | CMIT: 3.28-28.36 mg/kg<br>MIT: 12.94-60.79 mg/kg                                                                                                                                                                                               | Zhong et al., 2019                 |
|             | Cosmetics                                                                                                                               | HPLC                 | CMIT: 3.40-8.59 µg/g                                                                                                                                                                                                                           | Baranowska and Wojciechowska, 2013 |
| Environment | Surface water, dry and wet atmospheric depositions, wastewater treatment plant (WWTP) influent and effluent, and storm water (in Paris) | HPLC-MS/MS           | 1) Concentrations in dissolved fractions<br>CMIT: 5.6-120 ng/L<br>MIT: 14-860 ng/L<br>2) Concentrations in particulate fractions<br>CMIT: 32-4200 ng/g<br>MIT: 6.4-360 ng/g<br>3) Total concentration<br>CMIT: 5.6-57 ng/L<br>MIT: 39-106 ng/L | Paijens et al., 2020               |
|             | Environmental water samples (in Poland)                                                                                                 | HPLC                 | CMIT: 5.72-11.57 µg/L in river                                                                                                                                                                                                                 | Baranowska and Wojciechowska, 2013 |
|             | Combined sewer overflows (CSOs), and WWTP influents and effluents                                                                       | HPLC-MS/MS           | 1) CSOs<br>CMIT: <9.5-160 ng/L<br>MIT: 9.8-290 ng/L<br>2) WWTP influents<br>CMIT: <13 ng/L<br>MIT: 0.35-0.86 µg/L<br>3) WWTP effluents<br>CMIT: <3.7 ng/L<br>MIT: 0.039-0.35 µg/L                                                              | Paijens et al., 2021               |
|             | Beach sand, soil, and untreated sewage                                                                                                  | LC-MS/MS             | 1) Beach sands<br>MIT: 2.19-4.48 µg/L<br>2) Soils<br>MIT: 1.04-10.8 µg/L<br>4) Untreated sewage<br>MIT: 1.21 µg/L                                                                                                                              | Nowak et al., 2020                 |
|             | Urban surface waters and storm water sewers (in Denmark)                                                                                | HPLC-MS/MS           | 1) Urban surface water<br>MIT : 40-50 ng/L<br>2) Storm water (catchment)<br>MIT: 1.6 mg/rain event                                                                                                                                             | Bester et al., 2014                |

**Table S3. Acute lethal concentrations (LCs) and chronic effective concentrations (ECs) of CMIT/MIT in *Daphnia magna*.** Acute LCs and chronic ECs were estimated using drc package in R, and 95% confidence levels were marked together.

| LC/EC | Acute Assay<br>(Mortality)                             | Chronic Assay<br>(Reproduction)                           |
|-------|--------------------------------------------------------|-----------------------------------------------------------|
|       | Estimated Lethal<br>Concentrations ( $\mu\text{g/L}$ ) | Estimated Effective<br>Concentrations ( $\mu\text{g/L}$ ) |
| 10    | 17.74<34.79<51.83                                      | 1.92<4.25<6.58                                            |
| 20    | 27.50<43.36<59.23                                      | 3.71<6.44<9.17                                            |
| 50    | 48.30<63.20<78.09                                      | 9.57<13.08<16.60                                          |
| 90    | 63.72<114.81<165.90                                    | 24.59<40.25<55.90                                         |

**Table S4. Differentially expressed proteins (DEPs) after exposure to EC<sub>20</sub> CMIT/MIT compared with the control group in the parental generation (P0) of *Daphnia magna*.** The upregulated DEPs (fold change >1.20) and downregulated DEPs (fold change <0.83) are listed.

| Protein ID                  | Protein Name                                                                          | Gene Name         | Fold Change |
|-----------------------------|---------------------------------------------------------------------------------------|-------------------|-------------|
| <b>Upregulated Proteins</b> |                                                                                       |                   |             |
| A0A0P6A1T0                  | Putative endocuticle structural glycoprotein SgAbd-1                                  | APZ42_029388      | 1.99583     |
| E9G2A6                      | AA_TRNA_LIGASE_II domain-containing protein                                           | DAPPUDRAFT_127463 | 1.89533     |
| E9G2V0                      | Uncharacterized protein                                                               | DAPPUDRAFT_313111 | 1.53482     |
| E9G6X0                      | Cytochrome c oxidase subunit                                                          | DAPPUDRAFT_230594 | 1.50628     |
| E9GF22                      | Uncharacterized protein                                                               | DAPPUDRAFT_230815 | 1.47861     |
| E9G914                      | Uncharacterized protein                                                               | DAPPUDRAFT_194717 | 1.44289     |
| E9HEE5                      | Uncharacterized protein                                                               | DAPPUDRAFT_202596 | 1.43802     |
| E9HRW4                      | Uncharacterized protein                                                               | DAPPUDRAFT_333111 | 1.42743     |
| A0A164NMQ0                  | Arginine kinase                                                                       | APZ42_030553      | 1.42102     |
| A0A0N8A729                  | Cuticle protein (Cuticular protein)                                                   | APZ42_016420      | 1.41727     |
| E9GHL7                      | Uncharacterized protein                                                               | DAPPUDRAFT_303663 | 1.41615     |
| A0A164PIN1                  | Endocuticle structural glycoprotein SgAbd-1                                           | APZ42_029384      | 1.40575     |
| A0A164KJQ5                  | VWFD domain-containing protein                                                        | APZ42_033978      | 1.40106     |
| E9FRZ6                      | Uncharacterized protein                                                               | DAPPUDRAFT_230081 | 1.38788     |
| A0A162BZC1                  | Putative endocuticle structural glycoprotein SgAbd-1 (fragment)                       | APZ42_004954      | 1.38053     |
| E9GHL2                      | Uncharacterized protein                                                               | DAPPUDRAFT_303661 | 1.37861     |
| E9H6I9                      | Transgelin                                                                            | DAPPUDRAFT_308120 | 1.36334     |
| A0A164LPA0                  | Uncharacterized protein                                                               | APZ42_032543      | 1.35986     |
| E9GA32                      | Uncharacterized protein                                                               | DAPPUDRAFT_301581 | 1.35907     |
| A0A162NYZ9                  | Putative aminopeptidase N                                                             | APZ42_014873      | 1.35493     |
| E9HPM3                      | Uncharacterized protein                                                               | DAPPUDRAFT_302740 | 1.35125     |
| E9H2T2                      | Uncharacterized protein                                                               | DAPPUDRAFT_200339 | 1.33574     |
| E9GK07                      | Uncharacterized protein                                                               | DAPPUDRAFT_212175 | 1.33455     |
| A0A164YKH6                  | Putative basement membrane-specific heparan sulfate proteoglycan core protein         | APZ42_019106      | 1.32984     |
| E9GQU4                      | C-type lectin domain-containing protein                                               | DAPPUDRAFT_305228 | 1.32859     |
| A0A0P5MYN2                  | Myosin regulatory light-chain 2 smooth muscle (myosin regulatory light polypeptide 9) | APZ42_011326      | 1.32682     |
| A0A162S9F3                  | Chitin-binding type-2 domain-containing protein                                       | APZ42_012228      | 1.32342     |
| E9GHT0                      | Uncharacterized protein                                                               | DAPPUDRAFT_303748 | 1.31695     |

|            |                                                          |                   |         |
|------------|----------------------------------------------------------|-------------------|---------|
| A0A164H442 | Lysosomal alpha-glucosidase (fragment)                   | APZ42_004352      | 1.31549 |
| A0A164IVB1 | Uncharacterized protein                                  | APZ42_001606      | 1.30587 |
| E9GHL1     | Uncharacterized protein                                  | DAPPUDRAFT_303723 | 1.30421 |
| E9HAU2     | Uncharacterized protein (fragment)                       | DAPPUDRAFT_60605  | 1.30329 |
| A0A162BSN0 | Cuticular protein (Fragment)                             | APZ42_008427      | 1.29376 |
| E9HRW3     | Uncharacterized protein                                  | DAPPUDRAFT_333110 | 1.2929  |
| E9FX34     | Nucleoplasmin domain-containing protein                  | DAPPUDRAFT_305495 | 1.2894  |
| A0A162DGC9 | Myosin heavy chain                                       | APZ42_024143      | 1.27965 |
| E9G583     | Uncharacterized protein                                  | DAPPUDRAFT_313764 | 1.27541 |
| E9FV57     | Uncharacterized protein                                  | DAPPUDRAFT_220693 | 1.26763 |
| E9G2T7     | Anion exchange protein                                   | DAPPUDRAFT_193096 | 1.26489 |
| E9FRT1     | Muscle-specific actin                                    | ACT2A             | 1.26457 |
| E9G620     | Uncharacterized protein                                  | DAPPUDRAFT_230573 | 1.26047 |
| A0A164PJ70 | Cuticular protein 49Ag                                   | APZ42_029383      | 1.2601  |
| E9G9M2     | Uncharacterized protein                                  | DAPPUDRAFT_301619 | 1.25948 |
| E9FUF6     | AA_TRNA_LIGASE_II_ALA domain-containing protein          | DAPPUDRAFT_191289 | 1.25742 |
| A0A164PJ82 | Cuticular protein 49Ag                                   | APZ42_029380      | 1.25574 |
| E9FSI1     | Uncharacterized protein                                  | DAPPUDRAFT_190431 | 1.25402 |
| A0A0P5GEN8 | Paramyosin (Paramyosin, long form)                       | APZ42_025173      | 1.2499  |
| A0A164M3U2 | Villin-1                                                 | APZ42_032294      | 1.24151 |
| A0A164NU47 | Vitellogenin domain-containing protein                   | APZ42_030366      | 1.24042 |
| A0A164IVC2 | Uncharacterized protein (fragment)                       | APZ42_001605      | 1.23952 |
| A0A162RAN8 | Angiotensin-converting enzyme (EC 3.4.-.-)               | APZ42_012971      | 1.23851 |
| A0A164RZD6 | Mitochondrial-processing peptidase subunit beta          | APZ42_026803      | 1.23681 |
| A0A164XNK5 | Chymotrypsin-like protein                                | APZ42_019721      | 1.23599 |
| E9HPM5     | Uncharacterized protein                                  | DAPPUDRAFT_332314 | 1.23232 |
| A0A162NZ08 | Endoplasmic reticulum aminopeptidase 1                   | APZ42_014872      | 1.2298  |
| A0A164VQM0 | Putative cuticular protein analogous to peritrophins 3-C | APZ42_022677      | 1.22849 |
| E9GLD2     | Malic enzyme                                             | DAPPUDRAFT_304467 | 1.22659 |
| A0A0P5ZXT5 | Di-domain hemoglobin                                     | APZ42_022504      | 1.22463 |
| E9FTM4     | Peptidase S1 domain-containing protein                   | DAPPUDRAFT_230174 | 1.22109 |
| E9HAW7     | Sodium/potassium-transporting ATPase subunit alpha       | DAPPUDRAFT_309219 | 1.21996 |
| A0A162Q5W2 | Glutathione S transferase E10                            | APZ42_014224      | 1.21975 |

|                               |                                                                               |                   |         |
|-------------------------------|-------------------------------------------------------------------------------|-------------------|---------|
|                               | (glutathione S-transferase delta/epsilon10 isoform a)                         |                   |         |
| A0A164X3C5                    | NAD(P) transhydrogenase, mitochondrial                                        | APZ42_020909      | 1.21751 |
| A0A0P5M8I8                    | ATP synthase subunit gamma                                                    | APZ42_021777      | 1.21281 |
| E9FVX8                        | Lectin, mannose-binding, 1                                                    | DAPPUDRAFT_191157 | 1.21088 |
| A0A164WWC9                    | Uncharacterized protein                                                       | APZ42_021013      | 1.21056 |
| E9GGJ0                        | Peptidase S1 domain-containing protein                                        | DAPPUDRAFT_230857 | 1.20972 |
| E9FWY0                        | Tubulin beta chain                                                            | DAPPUDRAFT_305638 | 1.20515 |
| A0A162QYY2                    | Putative basement membrane-specific heparan sulfate proteoglycan core protein | APZ42_013388      | 1.20411 |
| A0A164RDZ2                    | Tissue factor pathway inhibitor                                               | APZ42_027182      | 1.20168 |
| <b>Downregulated Proteins</b> |                                                                               |                   |         |
| A0A164HC59                    | Vitellogenin fused with superoxide dismutase (fragment)                       | APZ42_003944      | 0.45368 |
| E9HF43                        | Uncharacterized protein                                                       | DAPPUDRAFT_202746 | 0.47291 |
| A0A162C7M7                    | Vitellogenin fused with superoxide dismutase (fragment)                       | APZ42_001431      | 0.51557 |
| A0A164EIE6                    | Vitellogenin fused with superoxide dismutase (fragment)                       | APZ42_008638      | 0.52241 |
| A0A164DXH9                    | Vitellogenin domain-containing protein (fragment)                             | APZ42_009585      | 0.62472 |
| A0A164H2H0                    | Uncharacterized protein (fragment)                                            | APZ42_004430      | 0.64195 |
| A0A164I1F8                    | Vitellogenin domain-containing protein (fragment)                             | APZ42_002789      | 0.64997 |
| A0A164ISY5                    | Vitellogenin fused with superoxide dismutase (fragment)                       | APZ42_001711      | 0.65446 |
| A0A164F1A5                    | Vitellogenin domain-containing protein (fragment)                             | APZ42_007869      | 0.66318 |
| E9GVW1                        | Uncharacterized protein                                                       | DAPPUDRAFT_213992 | 0.67158 |
| A0A164EGF3                    | Uncharacterized protein (fragment)                                            | APZ42_008709      | 0.67645 |
| E9GEV7                        | Uncharacterized protein                                                       | DAPPUDRAFT_302797 | 0.6969  |
| E9HK57                        | Uncharacterized protein                                                       | DAPPUDRAFT_189509 | 0.7017  |
| A0A0P5VG56                    | Pyruvate dehydrogenase E1 component subunit alpha (EC 1.2.4.1)                | APZ42_016439      | 0.70586 |
| E9G7B4                        | Uncharacterized protein                                                       | DAPPUDRAFT_314742 | 0.70803 |
| E9GMV5                        | Uncharacterized protein                                                       | DAPPUDRAFT_128589 | 0.71299 |
| A0A164H8I7                    | DUF1943 domain-containing protein                                             | APZ42_004153      | 0.71447 |
| A0A162NI02                    | Cellobiohydrolase CHBI                                                        | APZ42_015977      | 0.71553 |
| E9GA59                        | Uncharacterized protein                                                       | DAPPUDRAFT_230663 | 0.71659 |

|            |                                                                       |                   |         |
|------------|-----------------------------------------------------------------------|-------------------|---------|
| A0A164HTE3 | Vitellogenin fused with superoxide dismutase (fragment)               | APZ42_003122      | 0.72408 |
| E9H169     | Ribosomal_L16 domain-containing protein                               | DAPPUDRAFT_231299 | 0.73518 |
| E9G3M6     | Uncharacterized protein                                               | DAPPUDRAFT_230521 | 0.74254 |
| A0A0N8E998 | 60S ribosomal protein L35a                                            | APZ42_017722      | 0.74308 |
| E9H224     | Cct5-prov protein                                                     | DAPPUDRAFT_200182 | 0.74495 |
| E9H3D5     | Uncharacterized protein                                               | DAPPUDRAFT_231341 | 0.74711 |
| A0A164IW71 | VWFD domain-containing protein (Fragment)                             | APZ42_001569      | 0.74729 |
| E9GF14     | C-type lectin domain-containing protein                               | DAPPUDRAFT_230812 | 0.75609 |
| A0A164PP21 | 60S ribosomal L22 1-like protein                                      | APZ42_029533      | 0.75728 |
| E9G7M2     | Proteasome subunit beta (EC 3.4.25.1)                                 | DAPPUDRAFT_99667  | 0.76059 |
| E9HC90     | Proliferating cell nuclear antigen                                    | DAPPUDRAFT_309373 | 0.76553 |
| A0A164TME0 | Uncharacterized protein                                               | APZ42_024847      | 0.76749 |
| E9GFW1     | Uncharacterized protein                                               | DAPPUDRAFT_303327 | 0.77115 |
| E9G2H9     | 40S ribosomal protein S6                                              | Rps6              | 0.77583 |
| E9H405     | Malectin domain-containing protein                                    | DAPPUDRAFT_307649 | 0.78648 |
| E9GXS2     | KH type-2 domain-containing protein                                   | DAPPUDRAFT_306633 | 0.78779 |
| E9HZI6     | Vitellogenin fused with superoxide dismutase                          | VTG1              | 0.78985 |
| E9FUS8     | Histone H3                                                            | DAPPUDRAFT_235586 | 0.79213 |
| E9GYM5     | T-complex protein 1 subunit gamma                                     | DAPPUDRAFT_306806 | 0.79262 |
| E9HJW4     | Ribosomal protein L19                                                 | DAPPUDRAFT_301730 | 0.79294 |
| E9FY06     | Uncharacterized protein                                               | DAPPUDRAFT_305566 | 0.79622 |
| E9HJ97     | Ribosomal_S7 domain-containing protein                                | DAPPUDRAFT_301516 | 0.79677 |
| E9HAP6     | Small nuclear ribonucleoprotein Sm D2 (Sm-D2) (snRNP core protein D2) | DAPPUDRAFT_309154 | 0.79888 |
| A0A162PJL4 | 60S ribosomal protein L13                                             | APZ42_015493      | 0.80147 |
| E9HNC6     | HATPase_c domain-containing protein                                   | DAPPUDRAFT_302452 | 0.80185 |
| E9HU52     | Uncharacterized protein                                               | DAPPUDRAFT_231884 | 0.80305 |
| E9FSQ9     | Uncharacterized protein                                               | DAPPUDRAFT_310174 | 0.80394 |
| E9HEA0     | Uncharacterized protein                                               | DAPPUDRAFT_300630 | 0.80704 |
| E9G788     | Uncharacterized protein                                               | DAPPUDRAFT_301074 | 0.81083 |
| E9FR40     | 40S ribosomal protein S12                                             | DAPPUDRAFT_230117 | 0.8112  |
| E9GAT4     | Protein transport protein Sec61 subunit beta                          | DAPPUDRAFT_230689 | 0.81544 |
| E9G8G7     | Uncharacterized protein                                               | DAPPUDRAFT_223052 | 0.81955 |

|            |                                                                                                   |                   |         |
|------------|---------------------------------------------------------------------------------------------------|-------------------|---------|
| A0A0P6GST7 | 116 kDa U5 small nuclear ribonucleoprotein component protein (elongation factor G, mitochondrial) | APZ42_020697      | 0.82059 |
| E9H8K5     | Uncharacterized protein                                                                           | DAPPUDRAFT_308675 | 0.8215  |
| A0A164YQP7 | Thioredoxin domain-containing protein                                                             | APZ42_018662      | 0.82263 |
| E9HDC8     | Ribosomal_S10 domain-containing protein                                                           | DAPPUDRAFT_300540 | 0.82303 |
| E9HTS2     | Uncharacterized protein                                                                           | DAPPUDRAFT_231875 | 0.82532 |
| A0A164L230 | Cathepsin L                                                                                       | APZ42_033465      | 0.82705 |
| E9H9Z6     | Ribosomal_S13_N domain-containing protein                                                         | DAPPUDRAFT_308825 | 0.82899 |
| E9FU59     | 40S ribosomal protein S3a                                                                         | DAPPUDRAFT_303071 | 0.83001 |
| E9G121     | Uncharacterized protein                                                                           | DAPPUDRAFT_307788 | 0.83015 |
| E9FYC3     | Uncharacterized protein                                                                           | DAPPUDRAFT_306375 | 0.83103 |
| E9GGM3     | 40S ribosomal protein S8                                                                          | DAPPUDRAFT_303431 | 0.83117 |
| E9HBZ4     | Uncharacterized protein                                                                           | DAPPUDRAFT_256736 | 0.83181 |

## Reference

- Alvarez-Rivera, G., Dagnac, T., Lores, M., Garcia-Jares, C., Sanchez-Prado, L., Lamas, J.P., Llompарт, M., 2012. Determination of isothiazolinone preservatives in cosmetics and household products by matrix solid-phase dispersion followed by high-performance liquid chromatography-tandem mass spectrometry. *J. Chromatogr. A* 1270. <https://doi.org/10.1016/j.chroma.2012.10.063>
- Baranowska, I., Wojciechowska, I., 2013. The determination of preservatives in cosmetics and environmental waters by HPLC. *Polish J. Environ. Stud.* 22.
- Bester, K., Vollertsen, J., Bollmann, U.E., 2014. Water driven leaching of biocides from paints and renders (Pesticide Research No. 156, 2014).
- Lee, J.H., Paek, J.H., Park, H.N., Park, S., Kang, H., 2020. Screening and detection of methylisothiazolinone and chloromethylisothiazolinone in cosmetics by UPLC-MS/MS. *Anal. Sci. Technol.* 33. <https://doi.org/10.5806/AST.2020.33.3.125>
- Nowak, M., Zawadzka, K., Lisowska, K., 2020. Occurrence of methylisothiazolinone in water and soil samples in Poland and its biodegradation by *Phanerochaete chrysosporium*. *Chemosphere* 254. <https://doi.org/10.1016/j.chemosphere.2020.126723>
- Paijens, C., Bressy, A., Frère, B., Tedoldi, D., Mailler, R., Rocher, V., Neveu, P., Moilleron, R., 2021. Urban pathways of biocides towards surface waters during dry and wet weathers: Assessment at the Paris conurbation scale. *J. Hazard. Mater.* 402. <https://doi.org/10.1016/j.jhazmat.2020.123765>
- Paijens, C., Frère, B., Caupos, E., Moilleron, R., Bressy, A., 2020. Determination of 18 Biocides in Both the Dissolved and Particulate Fractions of Urban and Surface Waters by HPLC-MS/MS. *Water. Air. Soil Pollut.* <https://doi.org/10.1007/s11270-020-04546-6>
- Zhong, H., Li, Z., Chen, S., Zeng, Ying, Zheng, J., Zeng, You, Li, D., 2019. Simultaneous quantitative analysis of six isothiazolinones in water-based adhesive used for food contact materials by high-performance liquid chromatography–tandem mass spectrometry (HPLC–MS/MS). *Molecules* 24. <https://doi.org/10.3390/molecules24213894>
